# Supplementary material for: Novel heteroaromatic-based multi-branched dyes with enhanced two-photon absorption activityElectronic supplementary information (ESI) available: Experimental section. See http://www.rsc.org/suppdata/cc/b3/b305995b/
Source: Royal Society of Chemistry journal article supplement (doi:10.1039/b305995b), 2003-01-01
Supplement: b305995b.doc [file b305995b.doc]

Novel heteroaromatic-based multi-branched dyes with enhanced two-photon absorption activity

**Alessandro Abbotto,**a* Luca Beverina,*a* Renato Bozio,*b* Antonio Facchetti,*a* Camilla Ferrante,*b* Giorgio A. Pagani,**a* Danilo Pedron*b* and Raffaella Signorini*b***

*a Department of Materials Science and INSTM, University of Milano-Bicocca, Via Cozzi 53, I-20125, Milano, Italy; E-mail: alessandro.abbotto@unimib.it*

*b Department of Physical Chemistry and INSTM, University of Padova, Via Loredan 2, I-35131 Padova, Italy*

**Electronic Supplementary Information**

**Experimental Procedures.**

**Synthesis and Analytical Data of Compounds 1 and 2.**

1H and 13C NMR spectra were recorded at 27 °C using a Bruker AMX-500 spectrometer. The 1H spectrum of **2** was recorded at 100 °C in order to get a better signal resolution. Coupling constants *J* are given in Hertz. Anhydrous acetonitrile was prepared by refluxing over CaH2 for 3 h under a nitrogen atmosphere and subsequent distillation over molecular sieves. Melting points are uncorrected.

**Branched dye 1.** A solution of *N*-methyl-2-pyrrolecarboxaldehyde (1.545 g, 14.16 mmol) in *n*-butanol (10 mL) was added dropwise to a solution of *N*-methyl-*sym*-collidinium triflate (1.332 g, 4.42 mmol) in the same solvent (40 mL). Ten drops of piperidine were added to the colorless solution and the mixture was stirred at reflux for 6 h. The resulting red-violet mixture was concentrated to ca. 15 mL and the precipitate collected under reduced pressure. The solid was washed with toluene (10 mL) to give the product as a deep red powder (1.783 g, 3.21 mmol, 68 %) mp 250 °C (dec) (*n*-BuOH); 1H-NMR (CDCl3)  7.78 (2 H, s), 7.63 (1 H, d, *J* = 16.0), 7.52 (2 H, d, *J* = 15.4), 6.90 (1 H, d, *J* = 16.0), 6.82 (1 H, d, *J* = 3.8), 6.78 (2 H, s), 6.75 (2 H, d, *J* = 15.4), 6.75 (2 H, d, *J* = 3.7), 6.72 (1 H, s), 6.21 (2 H, d, *J* = 3.2), 6.17 (1 H, d, *J* = 3.2), 3.95 (3 H, s), 3.83 (6 H, s), 3.82 (3 H, s); EA calcd for C28H29F3N4O3S: C, 60.20 %; H, 5.23 %; N, 10.03 %. Found: C, 60.60 %; H, 5.29 %; N, 9.62 %.

**1-(Pyrid-4-yl)-2-(*N*-methyl-5-formylpyrrol-2-yl)ethene (3).** A 8 M aqueous solution of HBF4 (1.2 mL) was added dropwise to a yellow solution of 1-(pyrid-4-yl)-2-(*N*-methylpyrrol-2-yl)ethene[[1]](#endnote-2) (1.842 g, 10 mmol) in absolute ethanol (30 mL). The prompt formation of a red precipitate was observed. After the reaction mixture was stirred at room temperature for 30 min, the suspension was concentrated to ca. 10 mL and the precipitate collected and washed twice with toluene (2 x 5 mL) to give the tetrafluoborate salt of protonated 1-(pyrid-4-yl)-2-(*N*-methylpyrrol-2-yl)ethene (2.5 g, 9.2 mmol) as a red solid; the product was used in the subsequent step without any further purification. Anhydrous DMF (0.77 mL, 10 mmol) was added dropwise to freshly distilled POCl3 (0.93 mL, 10 mmol) at 0 °C under a nitrogen atmosphere. The resulting solution was stirred at 0 °C till a glassy white solid was obtained, which was taken up with anhyd. CH3CN (5 mL). To the resulting mixture a solution of the tetrafluoborate salt of protonated 1-(pyrid-4-yl)-2-(*N*-methylpyrrol-2-yl)ethene (2.5 g, 9.2 mmol) in anhyd. CH3CN (40 mL) was added dropwise at 0 °C in a period of 15 min. The mixture was stirred overnight at room temperature. The formation of an orange precipitate, which gradually evolved to yellow, was observed. The solvent was removed from the mixture under reduced pressure and the yellow residue taken up with ethanol (10 mL) and treated with an excess of a saturated aqueous solution of KHCO3 (30 mL) to leave the product (1.34 g, 6.3 mmol, 68.5 %): mp 139-140 °C (EtOH); 1H NMR (DMSO-*d6*)  9.53 (1 H, s), 8.57 (2 H, d, *J* = 5.4), 7.63 (2 H, d, *J* = 5.7), 7.59 (1 H, d, *J* = 16.2), 7.28 (1 H, d, *J* = 16.2), 7.08 (1 H, d, *J* = 4.2), 6.84 (1 H, d, *J* = 4.3), 4.02 (3 H, s); EA Calcd for C13H12N2O.¼ H2O: C, 72.04; H, 5.81; N, 12.84. Found: C, 72.15; H, 5.72; N, 12.84.

**Branched dye 2.** A solution of **3** (1.306 g, 6.1 mmol) in propylene glycol (15 mL) was added to a solution of *N*-cetyl-*sym*-collidinium triflate (0.460 mg, 0.93 mmol) and piperidine (5 drops) in the same solvent (10 mL). The resulting orange mixture was heated at 130 °C for 6 h yielding a dark violet solution which was cooled to room temperature and poured into Et2O (100 mL). The obtained precipitate was collected by filtration under reduced pressure to give the monoquaternized precursor of **2** as a black solid, which was washed with water (20 mL) and EtOH (5 mL) (0.270 mg, 0.25 mmol, 27 %) mp >350 °C (dec); 1H NMR (DMSO-*d6*) 8.53 (6 H, d, *J* = 4.6), 8.23 (2 H, s), 7.99 (1 H, d, *J* = 15.7), 7.75 (2 H, d, *J* = 15.0), 7.62 (2 H, d, *J* = 16.2), 7.61 (1 H, d, *J* = 15.0), 7.60 (1 H, d, *J* = 14.8), 7.58 (6 H, d, *J* = 4.2), 7.26 (2 H, d, *J* = 15.2), 7.17 (2 H, d, *J* = 3.7), 7.10 (3 H, d, *J* = 15.9), 6.99 (1 H, d, *J* = 4.2), 6.91 (3 H, m), 4.60 (2 H, t, broad), 3.96 (3 H, s), 3.95 (6 H, s), 1.78 (2 H, m, broad), 1.10-1.50 (26 H, m), 0.82 (3 H, t, *J* = 6.7); 13C NMR(DMSO-*d6*)  151.60 (2 C), 149.94 (6 C), 149.93 (1 C), 144.43 (3 C), 136.22 (1 C), 135.99 (2 C), 133.38 (1 C), 133.07 (2 C), 129.24 (2 C), 127.33 (1 C), 125.32 (1 C), 125.17 (2 C), 121.09 (3 C), 120.54 (6 C), 119.68 (1 C), 117.79 (2 C), 114.13 (2 C), 112.89 (2 C), 112.22 (1 C), 110.65 (1 C), 110.21 (2 C), 49.95 (1 C), 31.26 (1 C), 30.83 (1 C), 30 73 (2 C), 28.50-29.20 (12 C), 28.33 (1 C), 28.23 (1 C), 25.42 (1 C). A solution of cetyl triflate[[2]](#endnote-3) (2.050 g, 5.95 mmol) in anhyd. CH3CN (40 mL) was added, under nitrogen atmosphere, to a solution of the product obtained as described in the previous step (1.195 g, 1.11 mmol) in the same solvent (80 mL). The reaction mixture was stirred overnight at room temperature and the solvent evaporated to leave a residue which was taken up with Et2O (30 mL). The dark precipitate was collected by filtration under reduced pressure and washed several times with boiling hexane. The resulting solid was treated with boiling water to give the product as a dark blue powder (1.357 g, 0.62 mmol, 55.9 %). mp > 350 °C (EtOH); 1H NMR (DMSO-*d6*)  8.80 (4 H, m), 8.63 (2 H, m), 8.30 (2 H, s), 8.26 (1 H, d, *J* = 14.1), 8.18-8.15 (4 H, m), 8.02-7.96 (3 H, m) 7.92-7.86 (2 H, m), 7.82-7.74 (3 H, m), 7.39 (1 H, d, *J* = 15.3), 7.31-7.24 (3 H, m), 7.23-7.14 (3 H, m), 7.12-7.09 (2 H, m), 7.05 (1 H, m), 7.01 (1 H, m), 4.68 (2 H, t broad), 4.45 (6 H, t broad), 3.98 (6 H, s), 3.97 (3 H, s), 1.90 (6 H, m broad), 1.77 (2 H, s broad), 1.45-1.10 (104 H, m), 0.90-0.80 (12 H, m); FAB MS m/z 2054 (M - CF3SO3,21), 2053 (M - CF3SO3,29), 2052 (M - CF3SO3,35), 2051 (M - CF3SO3,26), 1904 (M - 2 CF3SO3, 72), 1903 (M - 2 CF3SO3, 100), 1902 (M - 2 CF3SO3, 87), 1755 (M - 3 CF3SO3, 41), 1754 (M - 3 CF3SO3, 59), calculated isotope distribution 2054 (15), 2053 (27), 2052 (35), 2051 (27), 1904 (72), 1903 (100), 1902 (77), 1755 (40), 1754 (59).

**Open Aperture Z-scan Measurements of the TPA Cross-Section.**

In Z-scan experiments[[3]](#endnote-4) (Fig. 1) the nonlinear absorption of the samples is measured by recording the transmittance as a function of the input intensity. When it is performed with a fast (fs) laser source, the Z-scan technique is able to discriminate between a coherent two-photon transition and a multiphoton sequential absorption involving excited states populated by non-radiative processes. In fact, most non-radiative processes occur on a picosecond or nanosecond timescale. Experiments performed with nanosecond pulses would therefore be affected by both types of process.[[4]](#endnote-5),[[5]](#endnote-6)

The used laser source was an amplified Ti-Sapphire fs laser system (Spectra Physics). It delivers 150 fs pulses at a repetition rate of 100 Hz, 0.7 mJ pulse energy, and 800 nm wavelength. The input beam was suitably attenuated by a set of neutral density filters. It was focussed with a 160-mm focal length lens on a 1-mm thick optical cell, mounted on a motorised translation stage (Newport M-UTM100P1HL) with 5-m resolution. The transmitted beam was focused on a large area photodiode, the signal of which was sampled by a 500 GHz oscilloscope (Tektronik TDS 520B). A personal computer stored the signal from the oscilloscope as a function of the sample position and controlled the motion of the translation stage. The temporal and spatial profiles of the input beam were measured independently both through autocorrelation experiments and by using a CCD camera (Pulnix TM-7CN) placed on the beam focus. The pulse energy was sampled with a pyroelectric detector (Molectron J3-05). Z-Scan measurements were performed with 0.050.35 J input pulse energies. The upper limit is chosen in such a way that neat DMSO does not show any multiphoton absorption.

**Fig. 1** Z-scan profiles for **1** (full circle; 2.9 x 10-2 M) and **2** (half filled circle; 2.1 x 10-3 M) obtained at the same laser intensity (i.e.: energy per unit time and per unit area).

References

1. S. Bradamante, A. Facchetti and G. A. Pagani, *J. Phys. Org. Chem.*, 1997, **10**, 514. [↑](#endnote-ref-2)
2. A. Abbotto, S. Bradamante, A. Facchetti and G. A. Pagani, *J. Org. Chem.*, 1997, **62**, 5755. [↑](#endnote-ref-3)
3. M. Sheik-Bahae, A. A. Said, T.-H.Wei, D. J. Hagan and E. W. Van Stryland, *IEEE J. Quantum El.* 1990, **26**, 760; T. H. Wei, D. J. Hagan, M. J. Sense, E. W. Van Stryland, J. W. Perry and D. R. Coulter, *Appl. Phys. B*, 1992, **54**, 46. [↑](#endnote-ref-4)
4. R. A. Negres, E. W. Van Stryland, D. J. Hagan, K. D. Belfield, K. J. Schafer, O. V. Przhonska and B. A. Reinhardt, *SPIE Proceed.*, 1999, **3796**, 88. [↑](#endnote-ref-5)
5. J. Swiatkiewicz, P. N. Prasad and B. A. Reinhardt, *Opt. Comm.*, 1998, **157**, 135. [↑](#endnote-ref-6)
